# Supplementary material for: A near-infrared fluorescent probe with an improved Stokes shift achieved by tuning the donor–acceptor–donor character of the rhodamine skeleton and its applications
Source: Royal Society of Chemistry journal article supplement (doi:10.1039/d0ra04373g), 2020-01-01
Supplement: d0ra04373g1.pdf [file d0ra04373g1.pdf]

## Supporting information

### **A near-infrared fluorescent probe with improved Stokes shift by tuning the donor-acceptor-donor character of rhodamine skeleton and its applications**

Jin Gong,<sup>†,‡</sup> Chang Liu,<sup>†</sup> Xiaojie Jiao,<sup>†</sup> Song He,<sup>†</sup> Liancheng Zhao,<sup>†,‡</sup> and Xianshun

Zeng<sup>\*,†,‡</sup>

<sup>†</sup> Tianjin Key Laboratory for Photoelectric Materials and Devices, School of Materials Science & Engineering, Tianjin University of Technology, Tianjin, 300384, China

<sup>‡</sup> School of Materials Science and Engineering, Harbin Institute of Technology, Harbin, 150001, China

## Contents

|                                                                                        |         |
|----------------------------------------------------------------------------------------|---------|
| <sup>1</sup> H, <sup>13</sup> C NMR spectra and HRMS of <b>RQ</b> and <b>RQS</b> ..... | S3-S5   |
| Normalized absorption and fluorescence spectra of <b>RQ</b> .....                      | S5      |
| Photophysical properties of <b>RQ</b> in different solvents.....                       | S6      |
| MTT assay of <b>RQ</b> .....                                                           | S6      |
| Fluorescent imaging of <b>RQ</b> .....                                                 | S6      |
| Comparison of detection limits of various probes for detecting Hg <sup>2+</sup> .....  | S6-S8   |
| Color changes of <b>RQS</b> towards Hg <sup>2+</sup> and various metal ions.....       | S9      |
| HRMS of <b>RQS</b> in the presence of Hg <sup>2+</sup> ions.....                       | S9      |
| pH-dependent fluorescent responses of <b>RQS</b> .....                                 | S9      |
| Time-dependent fluorescent responses of <b>RQS</b> .....                               | S9      |
| MTT assay of <b>RQS</b> .....                                                          | S10     |
| References.....                                                                        | S10-S11 |

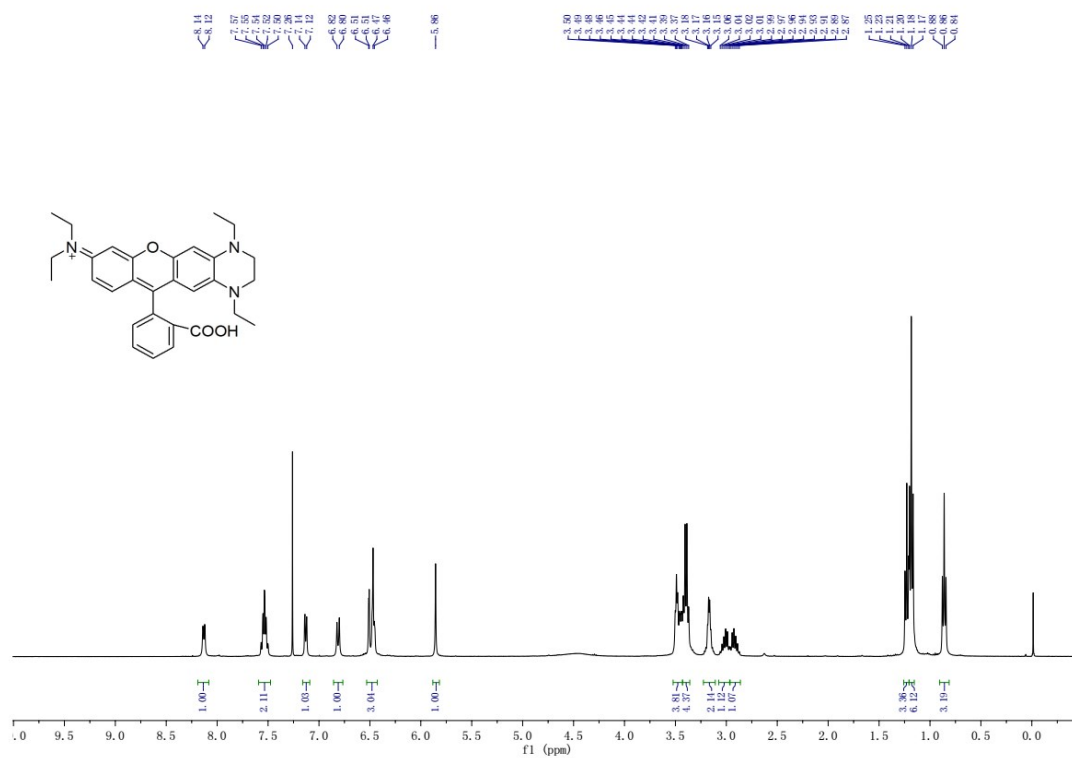

Figure S1.  $^1\text{H}$  NMR spectra of RQ in  $\text{CDCl}_3$

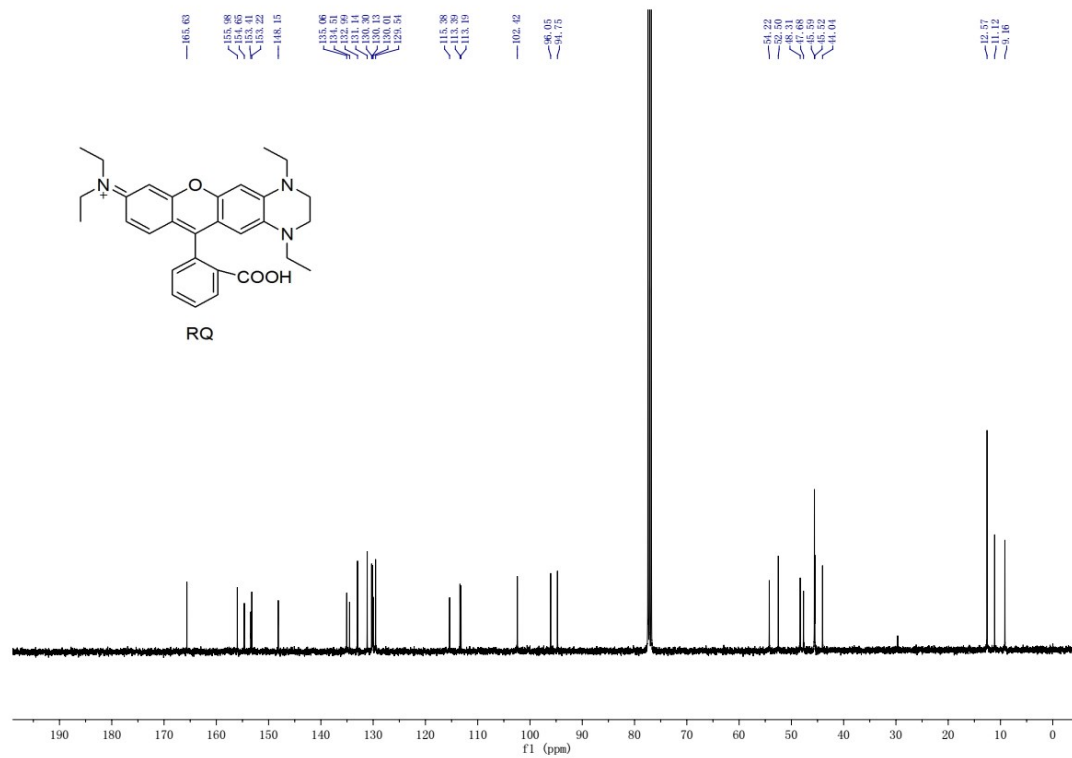

Figure S2.  $^{13}\text{C}$  NMR spectra of RQ in  $\text{CDCl}_3$

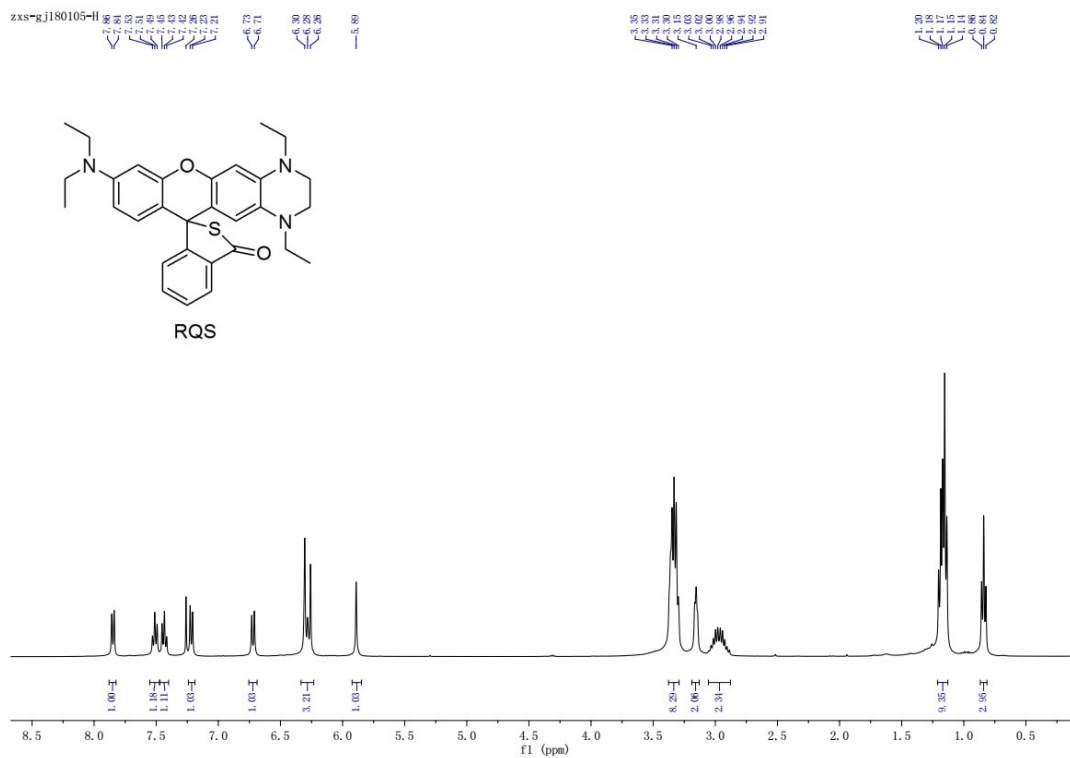

**Figure S3.** <sup>1</sup>H NMR spectra of RQS in CDCl<sub>3</sub>

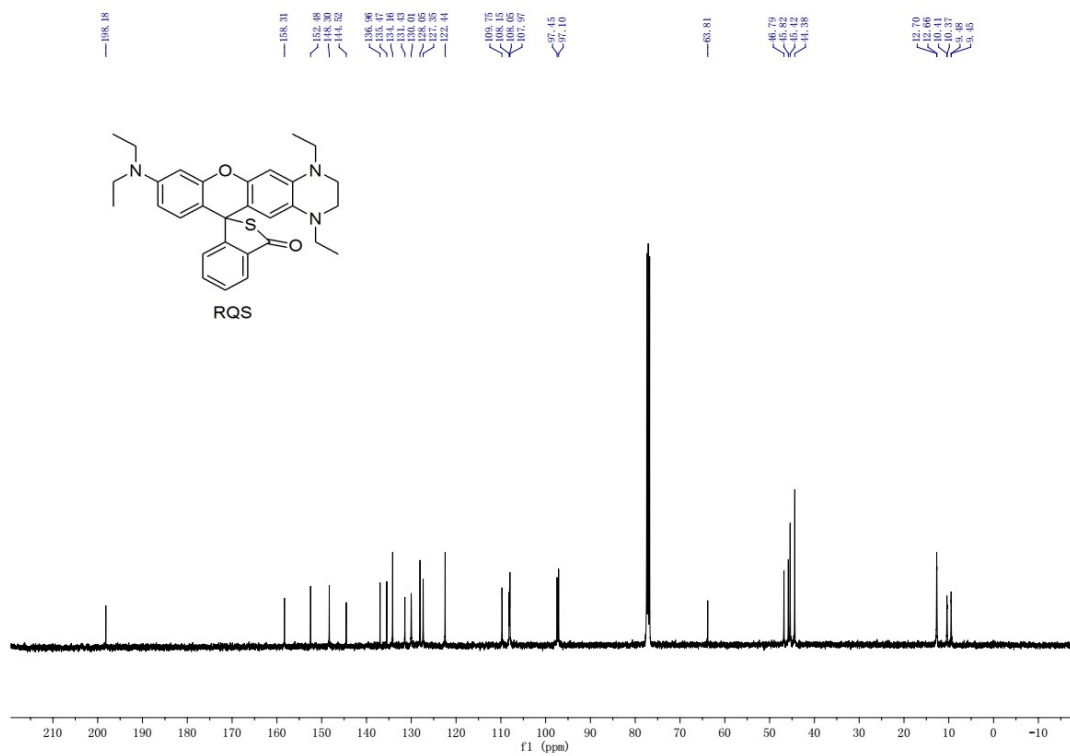

**Figure S4.** <sup>13</sup>C NMR spectra of RQS in CDCl<sub>3</sub>

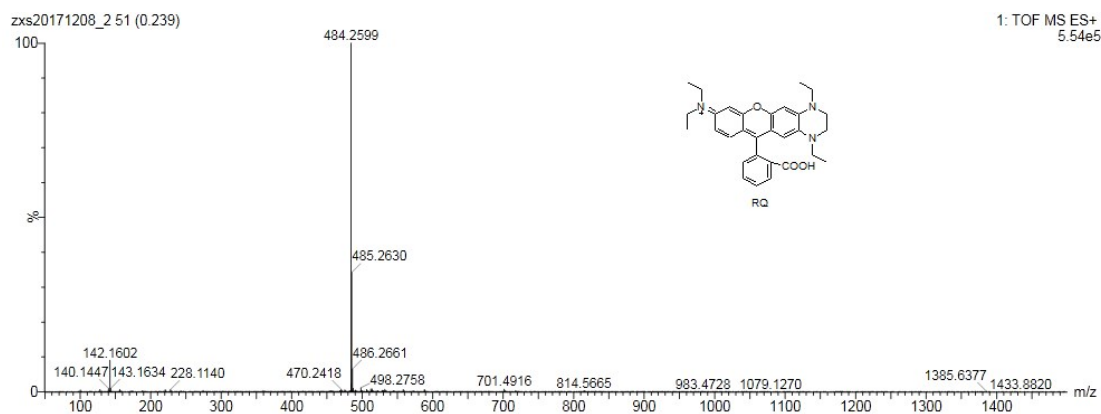

**Figure S5.** HRMS of RQ

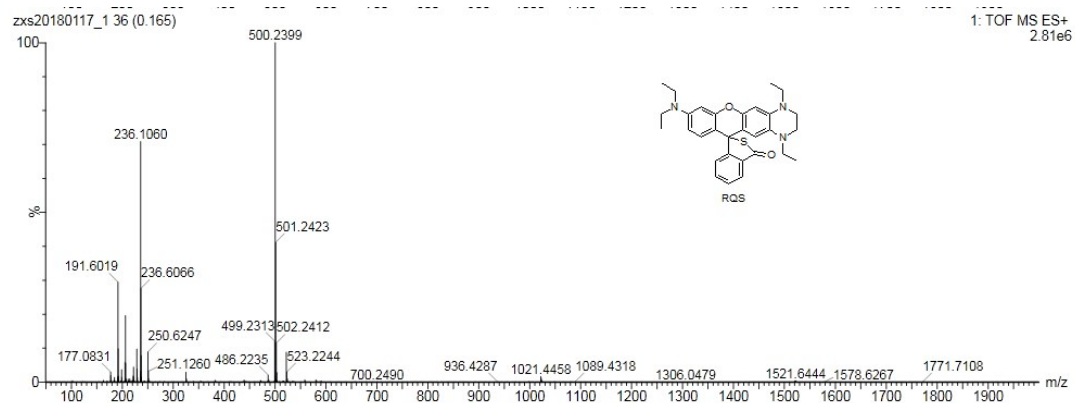

**Figure S6.** HRMS of RQS

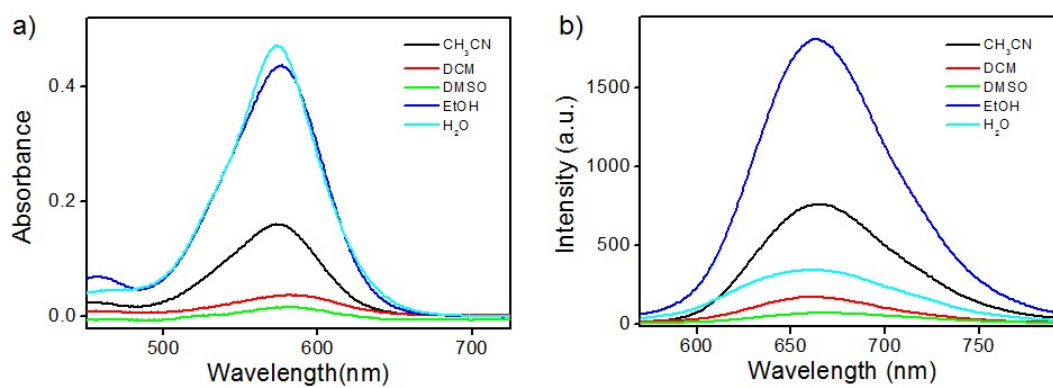

**Figure S7.** Absorption and fluorescence spectra of RQ in different solvents.

**Table S1.** Photophysical properties of **RQ** in different solvents.

| Sol.               | $\lambda_{\text{Abs}}$<br>(nm) | $\lambda_{\text{em}}$<br>(nm) | $\epsilon_{\text{b}}$<br>( $\text{M}^{-1}\text{cm}^{-1}$ ) | Stocks shift<br>(nm) | $\Phi_{\text{f}}$ |
|--------------------|--------------------------------|-------------------------------|------------------------------------------------------------|----------------------|-------------------|
| CH <sub>3</sub> CN | 573                            | 666                           | 16100                                                      | 93                   | 0.11              |
| DCM                | 580                            | 661                           | 3800                                                       | 81                   | 0.33              |
| EtOH               | 576                            | 664                           | 43700                                                      | 88                   | 0.09              |
| H <sub>2</sub> O   | 573                            | 662                           | 47100                                                      | 89                   | 0.03              |
| DMSO               | 581                            | 670                           | 1700                                                       | 89                   | 0.07              |

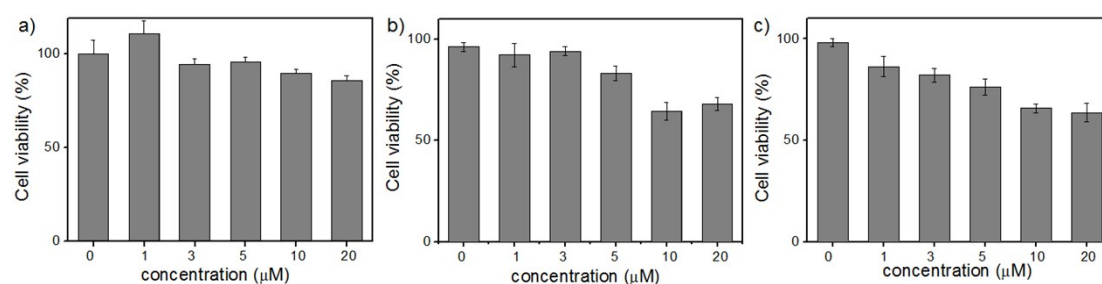

**Figure S8.** MTT assay of **RQ**. a) 24 h; b) 48 h; c) 72 h.

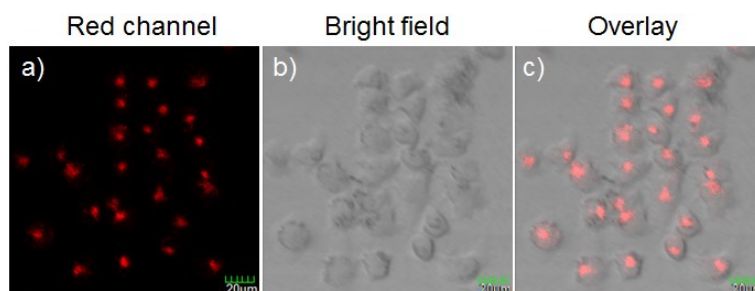

**Figure S9.** Fluorescent images of HeLa cells incubated with **RQ** (1 μM) for 30 min.  $\lambda_{\text{ex}} = 559 \text{ nm}$ ,  $\lambda_{\text{em}} = 618\text{--}718 \text{ nm}$ .

**Table S2.** Comparison of detection limits of various probes for detecting Hg<sup>2+</sup>.<sup>1-14</sup>

| No. | Sensor structures                                                                   | LOD<br>(nM) | $\lambda_{\text{Abs}}$<br>(nm) | $\lambda_{\text{em}}$<br>(nm) | Stocks shift (nm) |
|-----|-------------------------------------------------------------------------------------|-------------|--------------------------------|-------------------------------|-------------------|
| 1   | 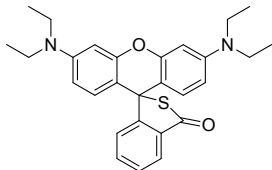 | 20          | 560                            | 585                           | 25                |

|   |                                                                                     |              |     |     |    |
|---|-------------------------------------------------------------------------------------|--------------|-----|-----|----|
| 2 | 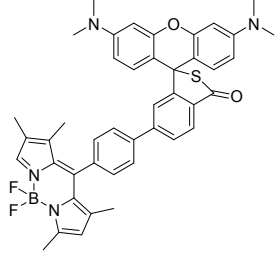   | ppm<br>scale | 557 | 585 | 28 |
| 3 |    | 3.2          | 568 | 587 | 29 |
| 4 |    | 81           | 659 | 687 | 28 |
| 5 |   | 0.93         | 564 | 584 | 20 |
| 6 |  | 2.5          | 565 | 576 | 11 |
| 7 |  | 28.5         | 556 | 573 | 17 |
| 8 |  | 5.5          | 503 | 576 | 73 |
| 9 |  | 870          | 720 | 760 | 40 |

|    |                                                                                    |          |            |            |           |
|----|------------------------------------------------------------------------------------|----------|------------|------------|-----------|
| 10 | 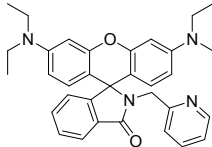  | 10       | 545        | 575        | 30        |
| 11 |   | 195      | 560        | 575        | 15        |
| 12 |   | 9.1      | 565        | 590        | 25        |
| 13 |   | 140      | 561        | 578        | 17        |
| 14 |  | 191      | 730        | 746        | 16        |
| 15 | <b>This work</b>                                                                   | <b>2</b> | <b>680</b> | <b>584</b> | <b>96</b> |

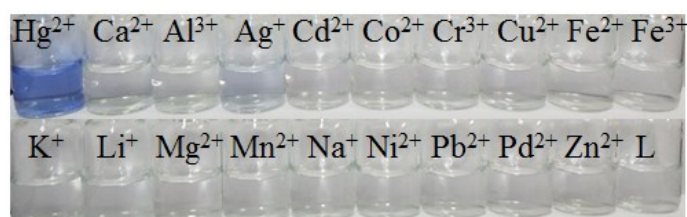

**Figure S10.** Color change of **RQS** with metal ions.



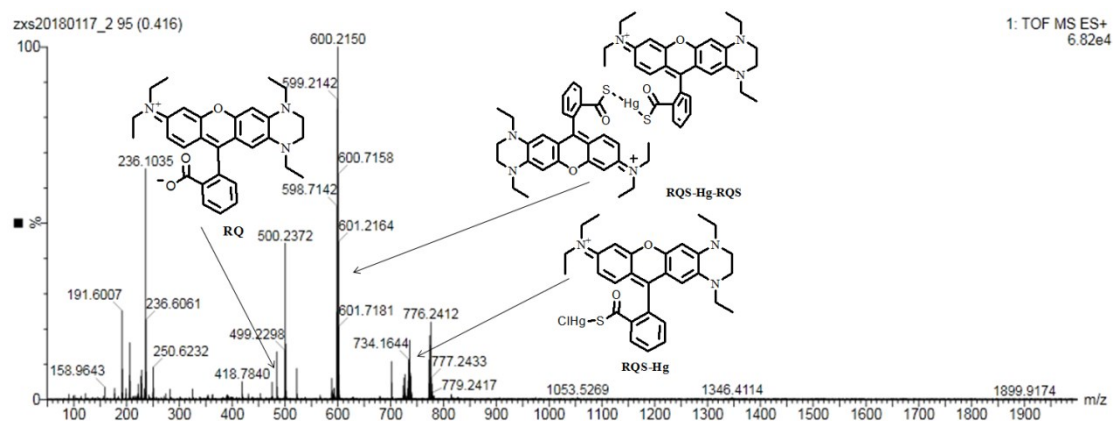

**Figure S11.** HRMS of the reaction products of **RQS** with 2 equiv of  $\text{Hg}^{2+}$ .

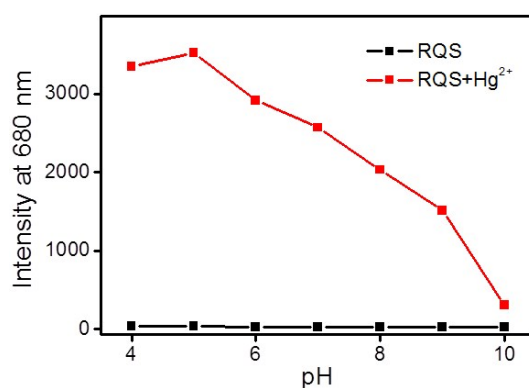

**Figure S12.** Effect of pH on the fluorescence intensity of **RQS** ( $10 \mu\text{M}$ ) in the absence (black line) and presence of  $100 \mu\text{M Hg}^{2+}$  (red line).

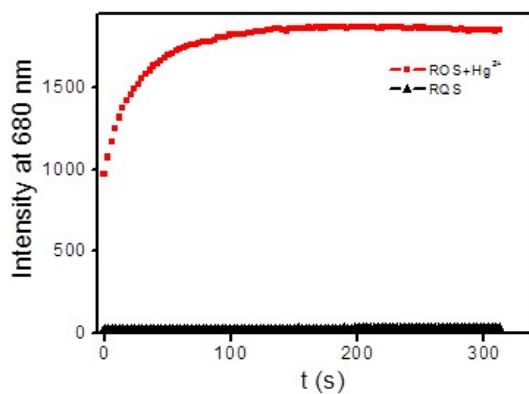

**Figure S13.** Time-dependence of the fluorescence intensity at 680 nm of **RQS** ( $10 \mu\text{M}$ ) with  $100 \mu\text{M Hg}^{2+}$ .

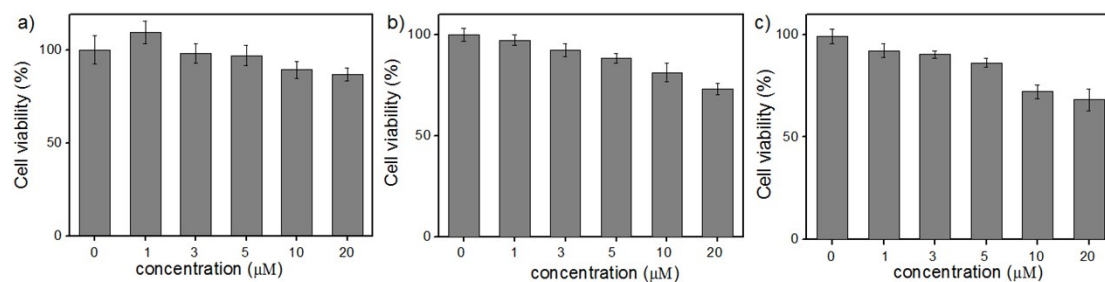

**Figure S14.** MTT assay of RQS. a) 24 h; b) 48 h; c) 72 h.

## References

- (1) E. M. Nolan and S. J. Lippard, *Chem. Rev.* 2008, **108**, 3443;
- (2) J. Hatai, S. Pal, G. P. Jose and S. Bandyopadhyay, *Inorg. Chem.*, 2012, **51**, 10129.
- (3) J. Tao, X. Wang, X. Chen, T. Li, Q. Diao, H. Yu and T. Wang, *Dyes Pigm.*, 2017, **137**, 601.
- (4) W. Shi and H. Ma, *Chem. Commun.*, 2008, **16**, 1856;
- (5) J. Liu, D. Wu, X. Yan and Y. Guan, *Talanta*, 2013, **116**, 563;
- (6) X. Zhan, Z. Qian, H. Zheng, B. Su, Z. Lan and J. Xu, *Chem. Commun.*, 2008, **16**, 1859;
- (7) S.G. Roy, S. Mondal and K. Ghosh, *New J. Chem.*, 2020, **44**, 5921;
- (8) M. Wang, J. Wen, Z. Qin and H. Wang, *Dyes Pigm.*, 2015, **120**, 208;
- (9) H. Yu, Y. Xiao, H. Guo and X. Qian, *Chem. Eur. J.*, 2011, **17**, 3179;
- (10) S. Mandal, A. Banerjee, D. Ghosh, D. K. Mandal, D. A. Safin, M. G. Babashkina, K. Robeyns, M. P. Mitoraj, P. Kubisiak, Y. Garcia and Debasis Das, *Dalton Trans.*, 2015, **44**, 13186;
- (11) Z. Yang, S. Chen, Y. Zhao, P. Zhou and Z. Cheng, *Sens. and Actuators B Chem.*, 2018, **266**, 422;
- (12) M. Hong, Y. Chen, Y. Zhang and D. Xu, *Analyst*, 2019, **144**, 7351
- (13) S. Yao, Y. Qian, Z. Qi, C. Lu and Y. Cui, *New J. Chem.*, 2017, **41**, 13495;
- (14) Y. Li, S. Qi, C. Xia, Y. Xu, G. Duan and Y. Ge, *Anal. Chim. Acta.*, 2019, **1077**, 243.
